# Supplementary material
Source: publisher site journal article supplement (https://www.spandidos-publications.com/7709/downloadSupplementary)
Supplement: Supplementary file 1 [file downloadSupplementary]

Table SI. Median survival rates for different subgroups.

| Characteristic                  | Median survival (95% CI) | P-value |
|---------------------------------|--------------------------|---------|
| Age, years                      |                          | 0.023   |
| <75                             | 22 (10, 35)              |         |
| ≥75                             | 36 (31, 65)              |         |
| Sex                             |                          | 0.743   |
| Female                          | 35 (20, 94)              |         |
| Male                            | 27 (20, 38)              |         |
| Histology                       |                          | 0.774   |
| Adenocarcinoma                  | 31 (9, 65)               |         |
| Large cell lung carcinoma       | 35 (-, -)                |         |
| Not otherwise specified         | 46 (36, -)               |         |
| Squamous cell carcinoma         | 27 (24, 65)              |         |
| Grading                         |                          | 0.234   |
| Known                           | 38 (32, 94)              |         |
| Unknown                         | 26 (18, 32)              |         |
| Charlson comorbidity index      |                          | 0.952   |
| <3                              | 28 (-, -)                |         |
| >8                              | 34 (11, -)               |         |
| 3-5                             | 32 (24, -)               |         |
| 6-8                             | 26 (18, 42)              |         |
| Karnofsky performance status, % |                          | 0.385   |
| >70                             | 35 (24, 65)              |         |
| ≤70                             | 27 (18, 38)              |         |
| Positron emission tomography    |                          | 0.841   |
| No                              | 29 (10, 94)              |         |
| Yes                             | 31 (21, 42)              |         |
| -, not applicable.              |                          |         |
